# Supplementary material for: Gender-affirming hormone therapy induces specific DNA methylation changes in blood
Source: PubMed Central journal article supplement (PMC8851870; doi:10.1186/s13148-022-01236-4), 2022-02-17
Supplement: 13148_2022_1236_MOESM10_ESM.pdf [file 13148_2022_1236_MOESM10_ESM.pdf]

A

PCA plot of 1st 10 principal components

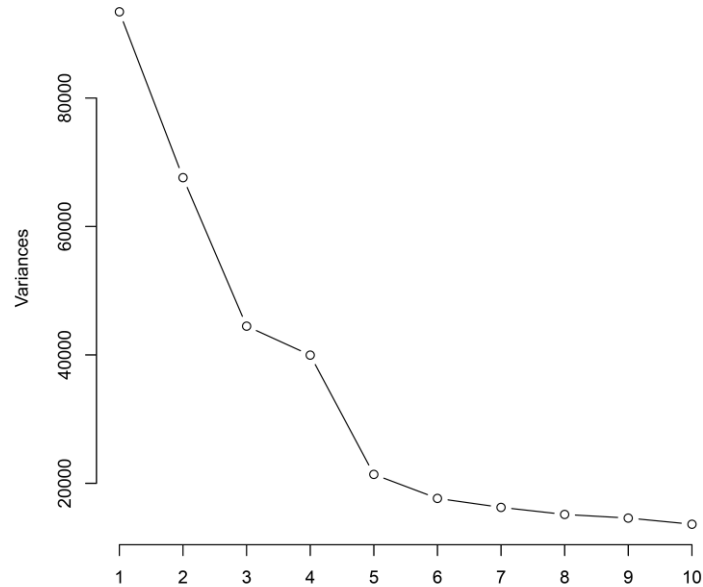

B

PCA – Confounders relationships  
'correlation (p-value)'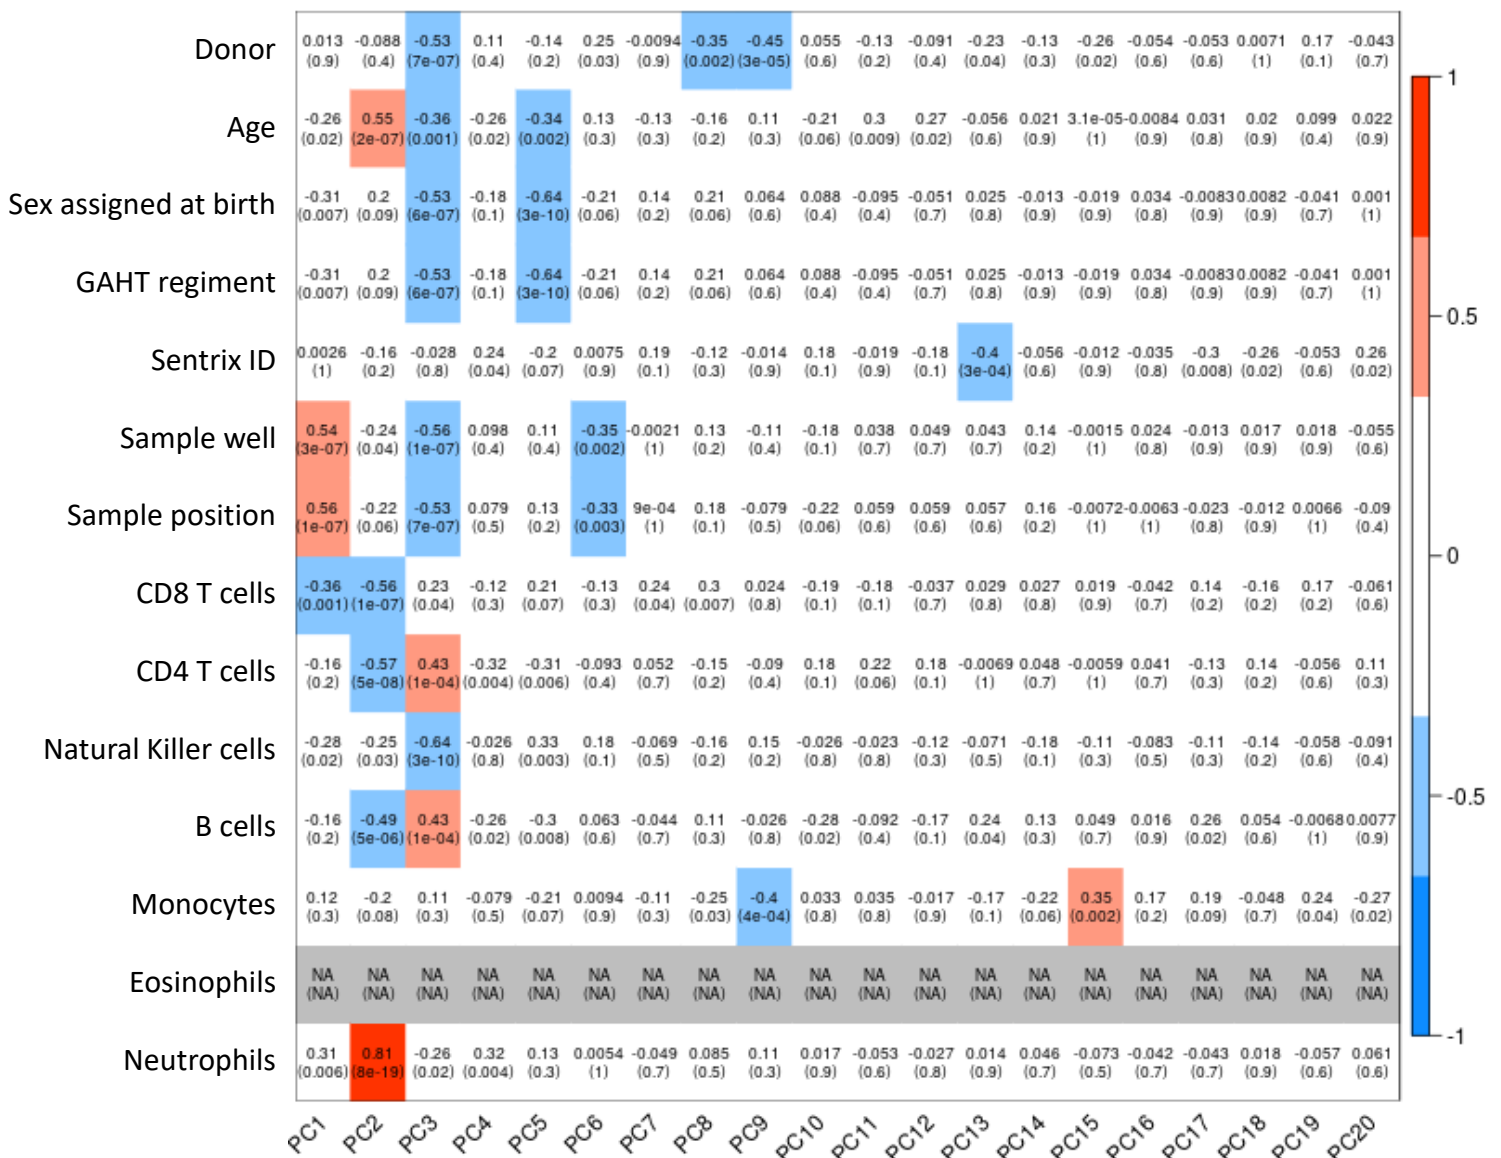

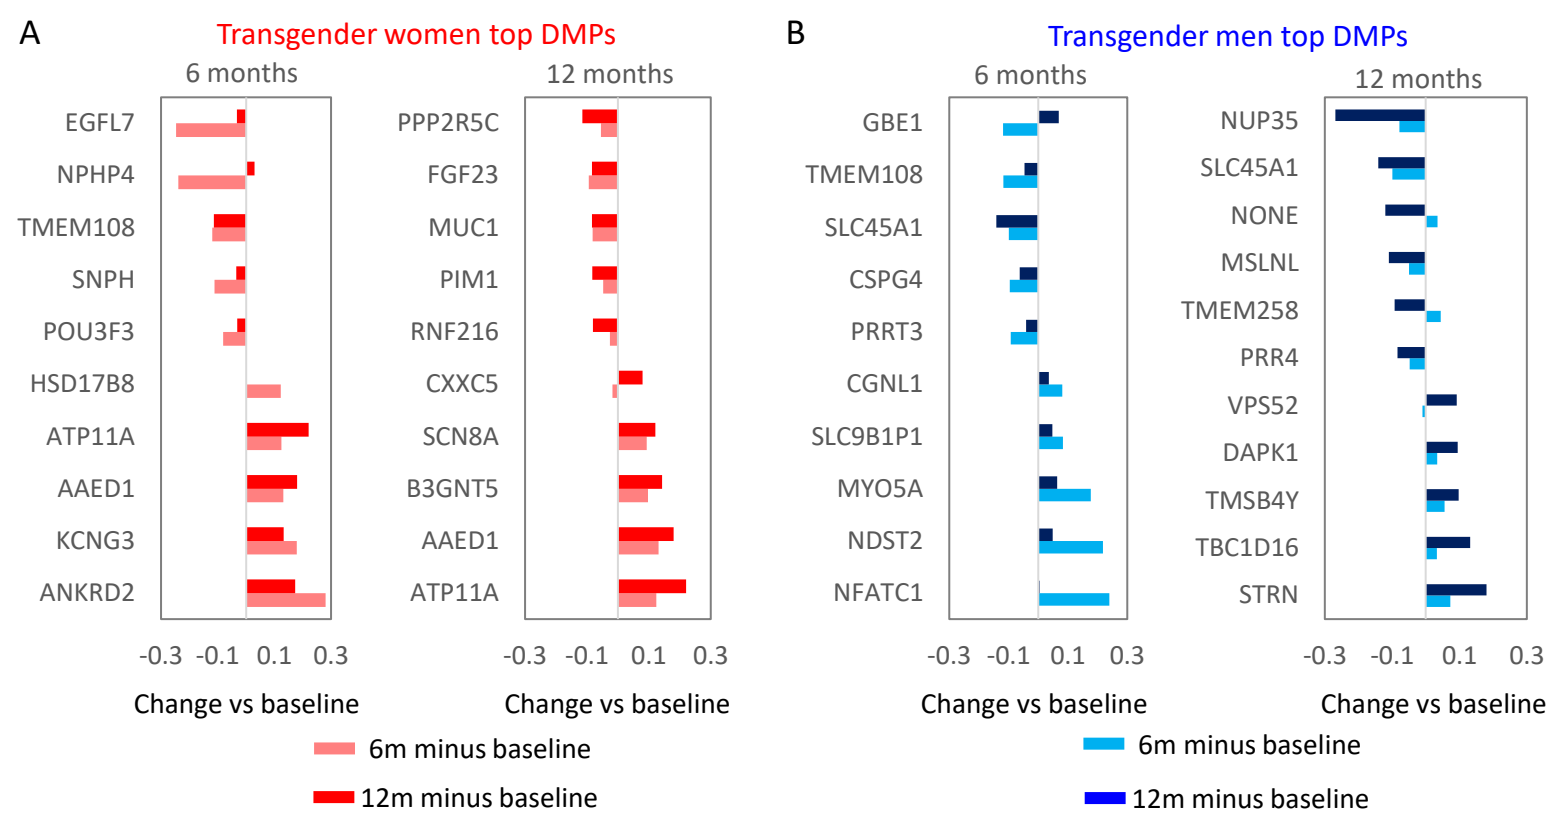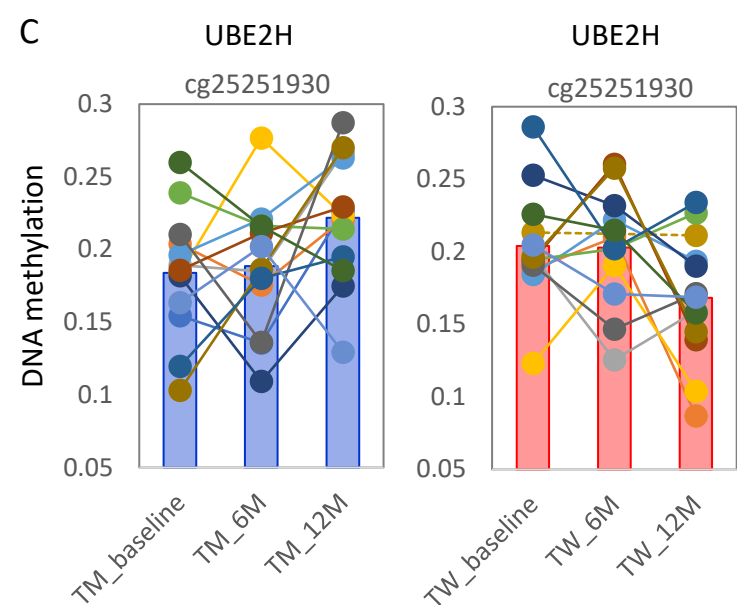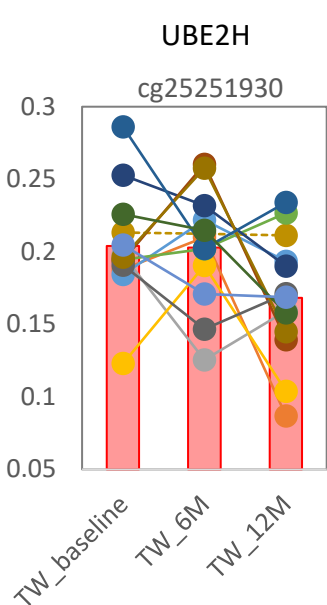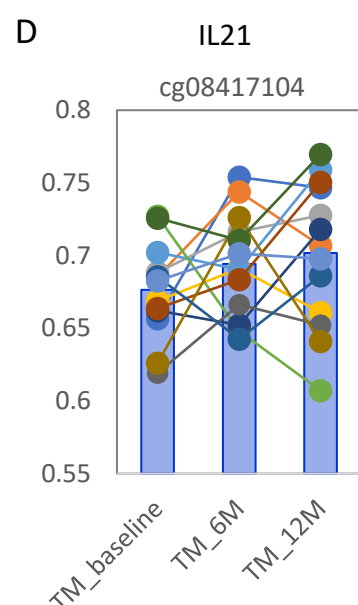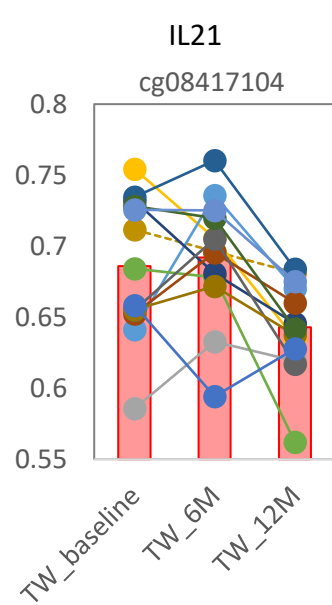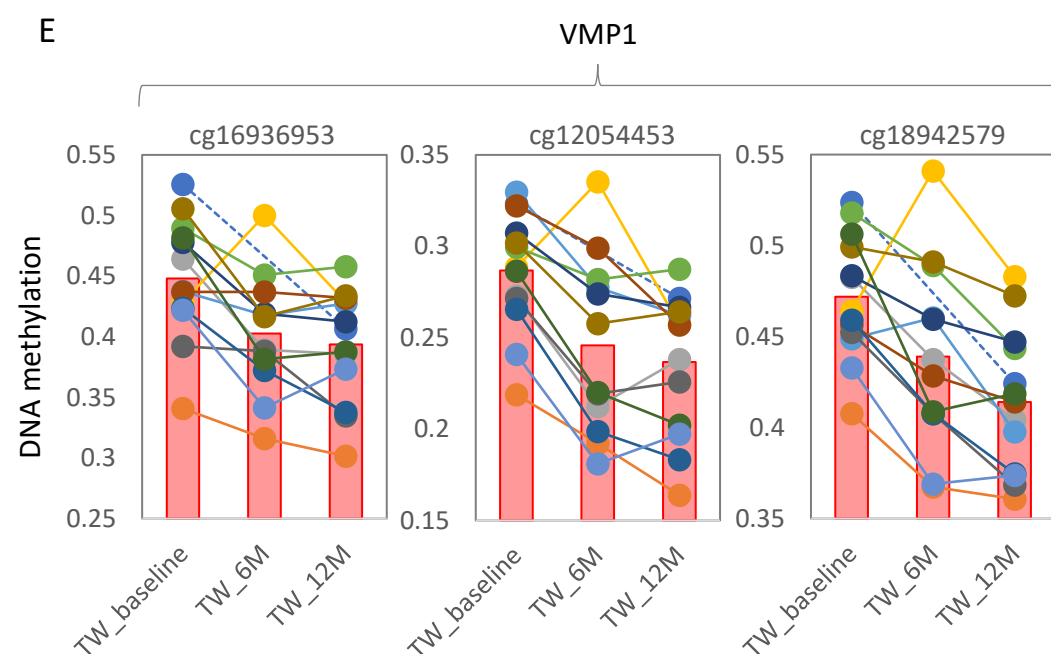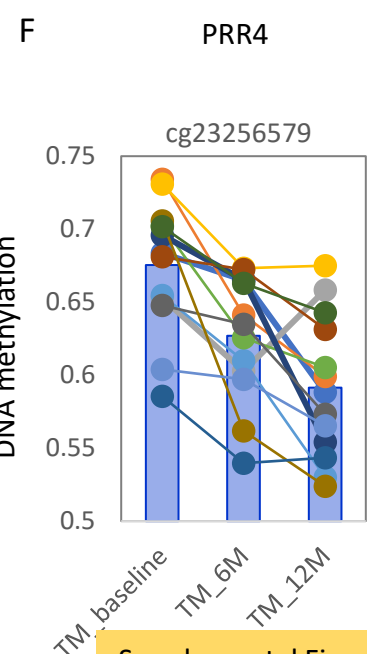

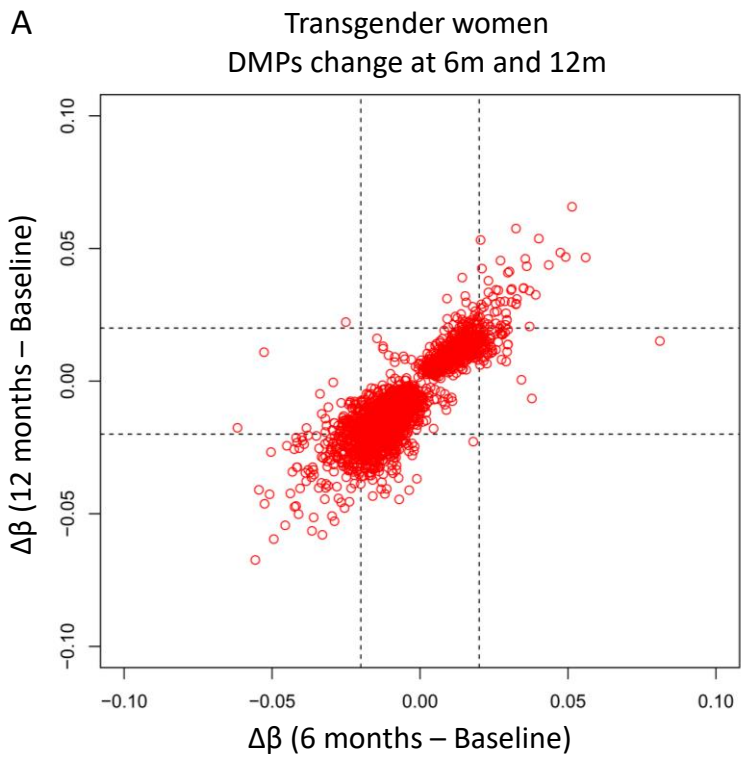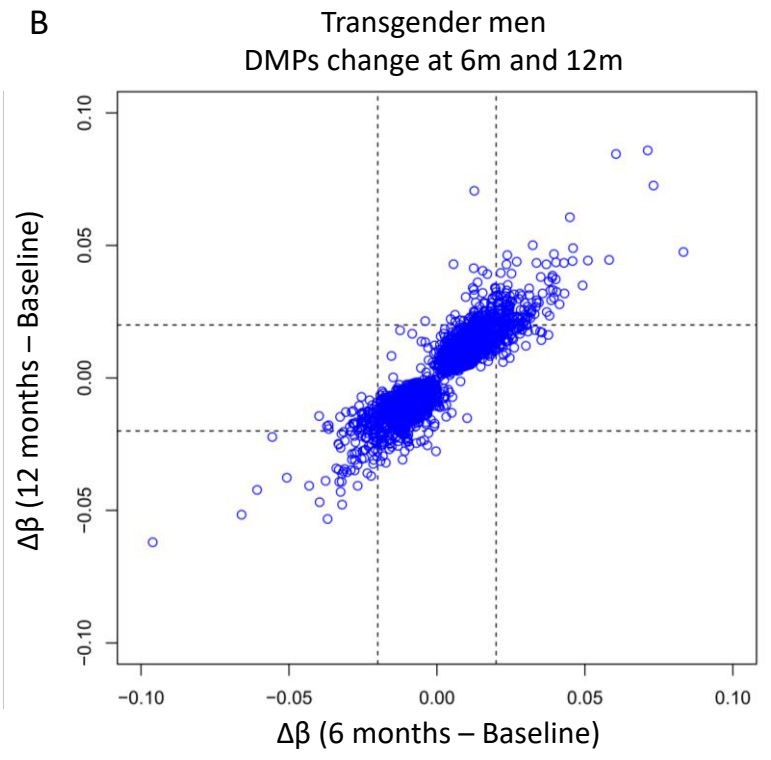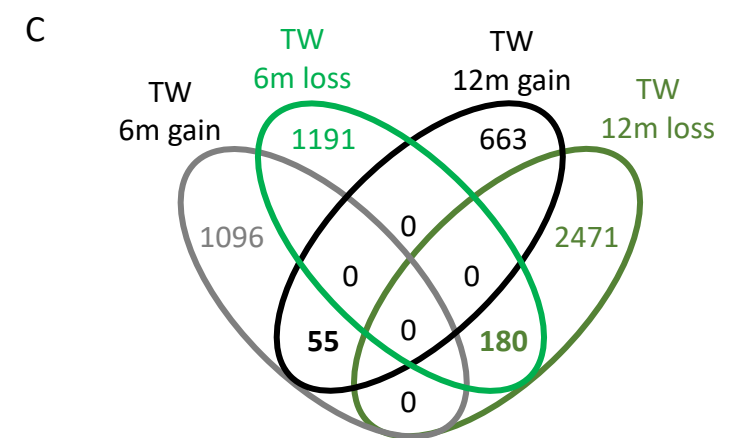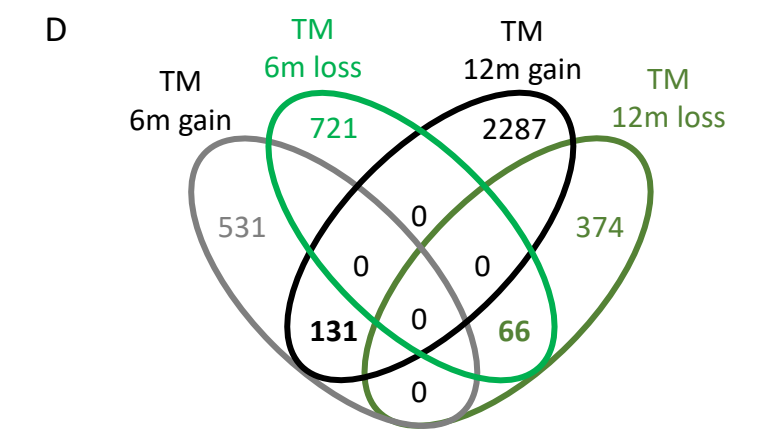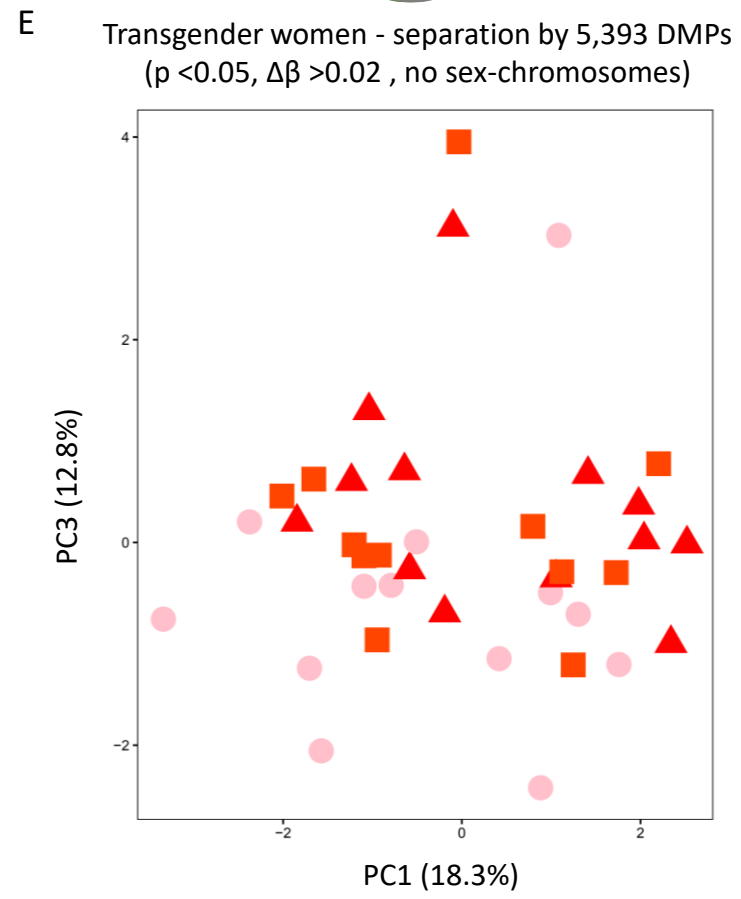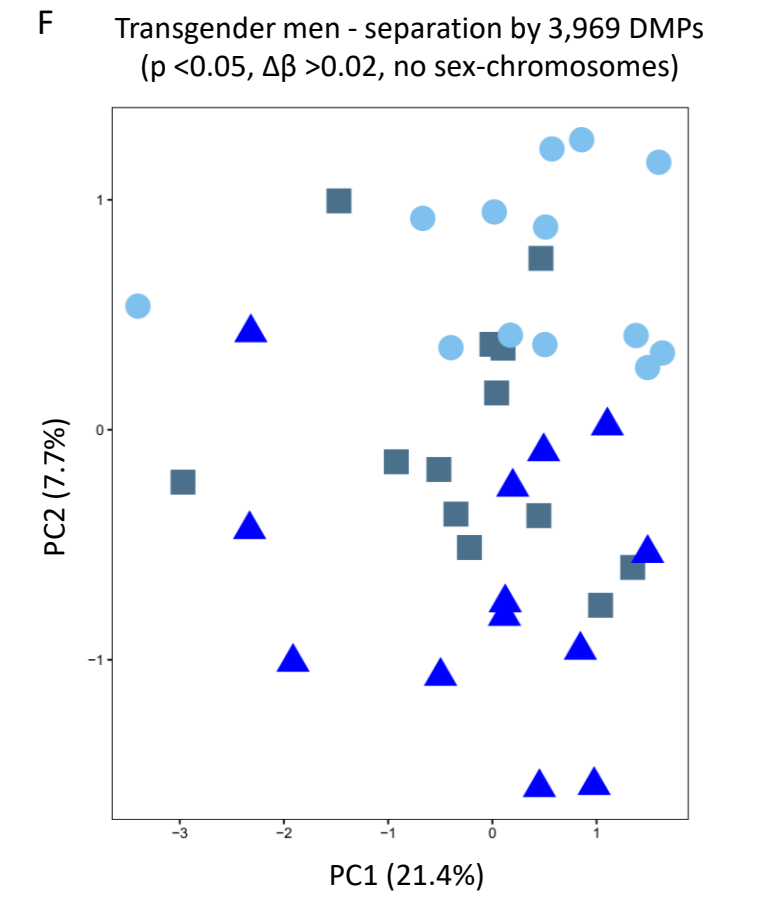

Transgender women: ● baseline, ■ 6 months, ▲ 12 months

Transgender men: ● baseline, ■ 6 months, ▲ 12 months

**A**Feminizing  
GAHT DMP  
clusters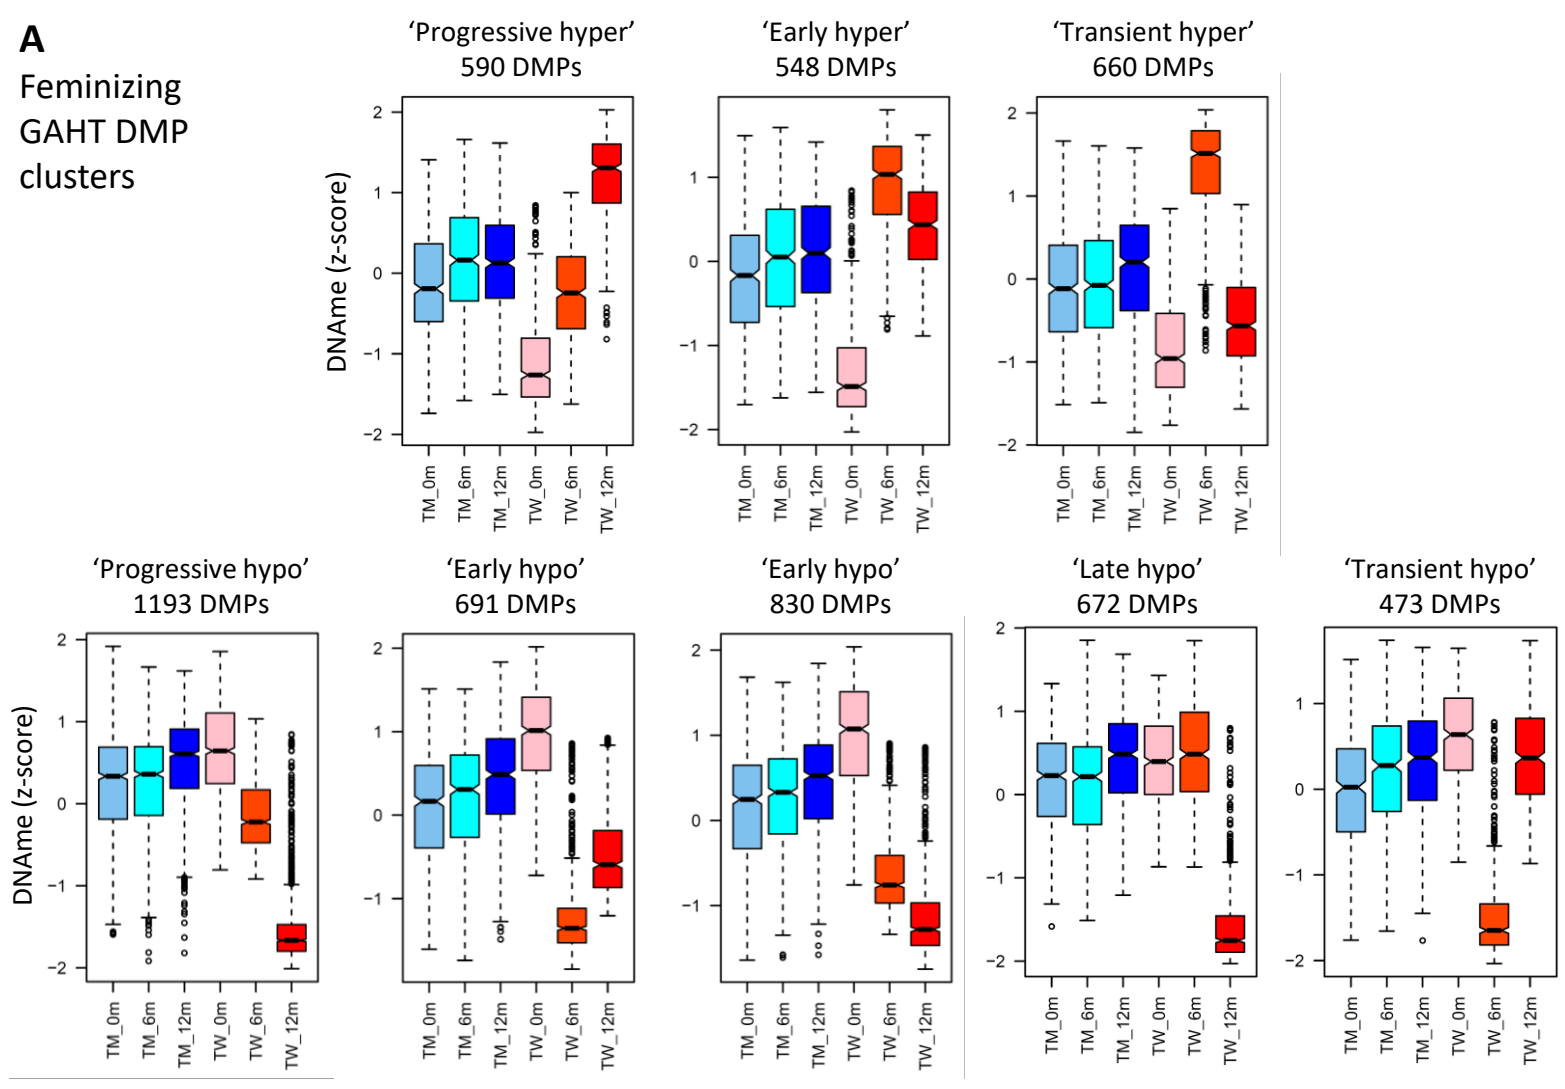**B**

Masculinizing GAHT DMP clusters

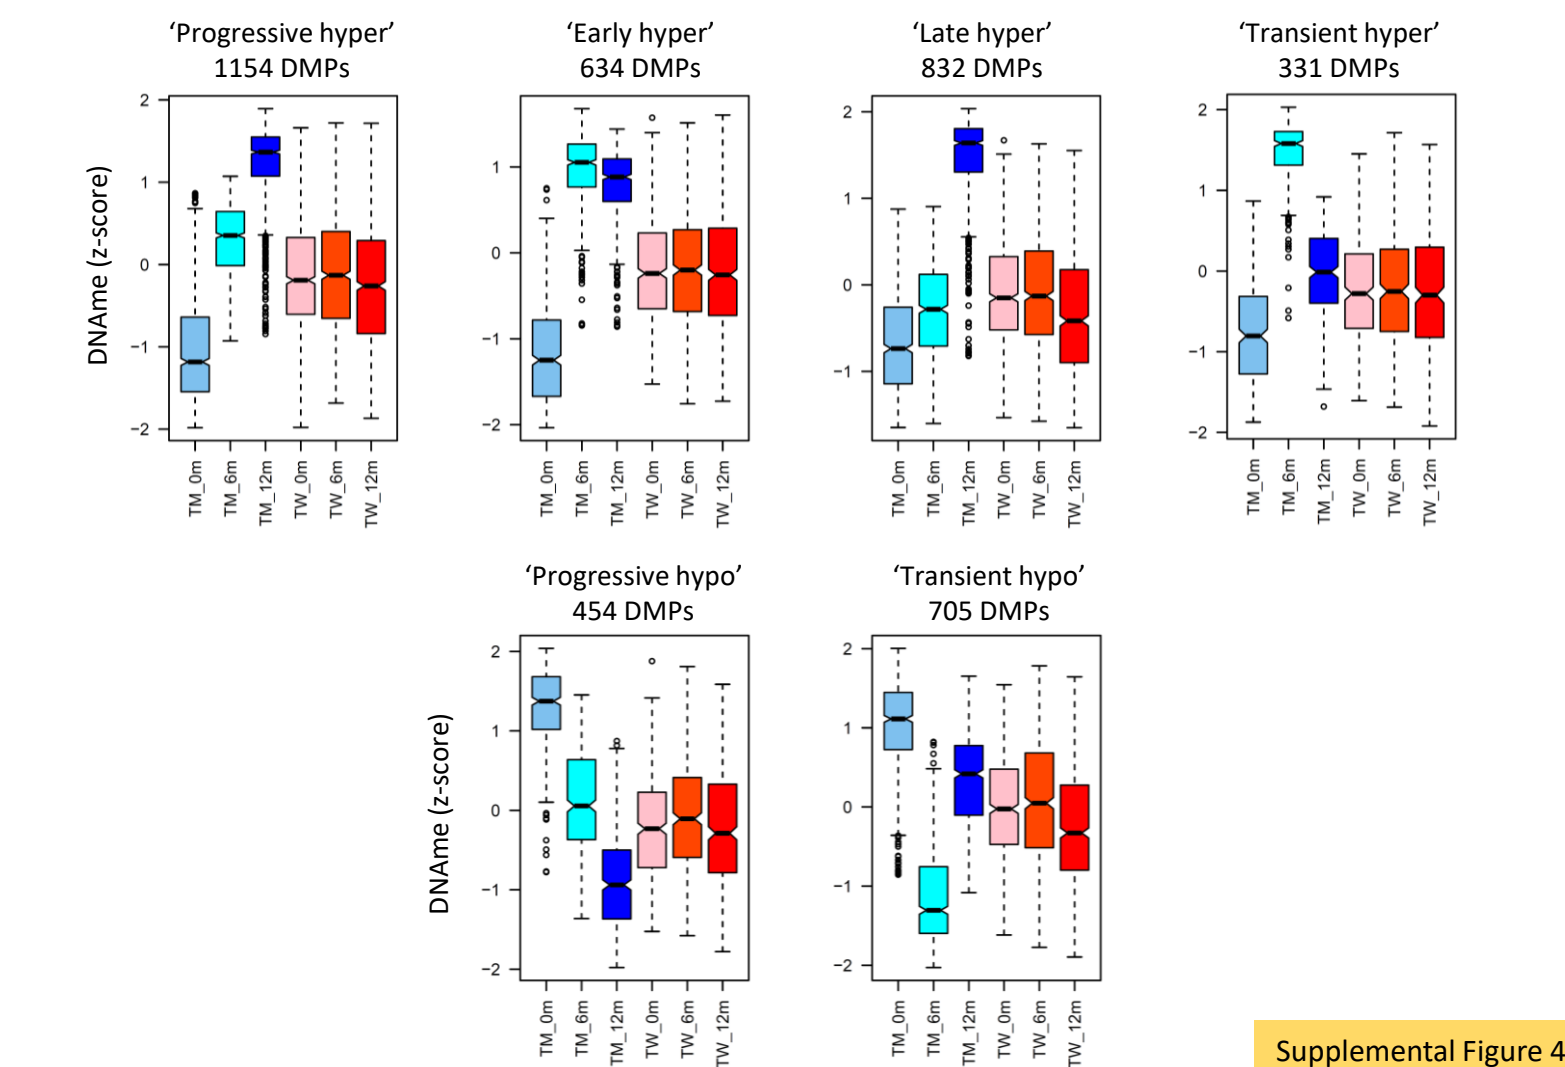

**A** Top probes in feminizing and/or masculinizing comparisons  
(Means highlighted)

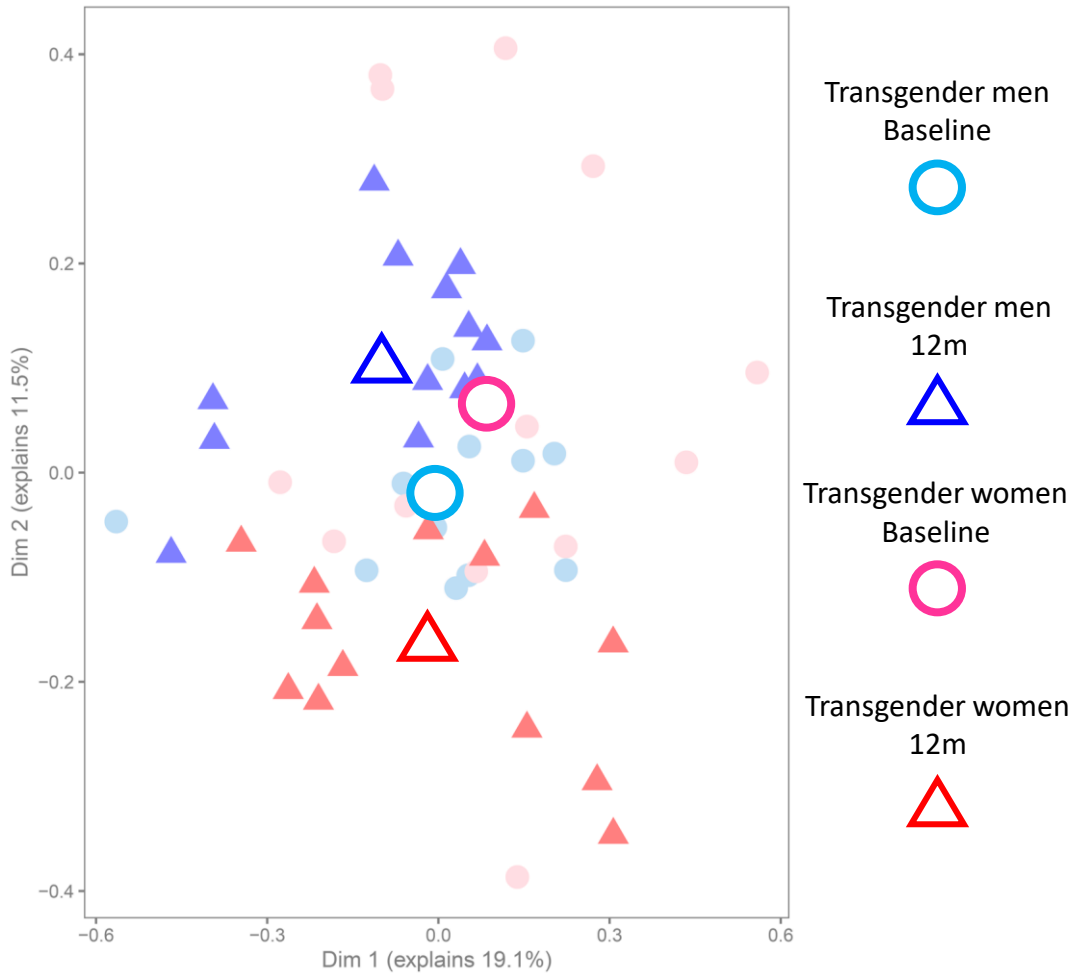

**B** Feminizing GAHT 12m DMPs ( $p < 0.05$ ,  $\Delta\beta > 0.02$ )

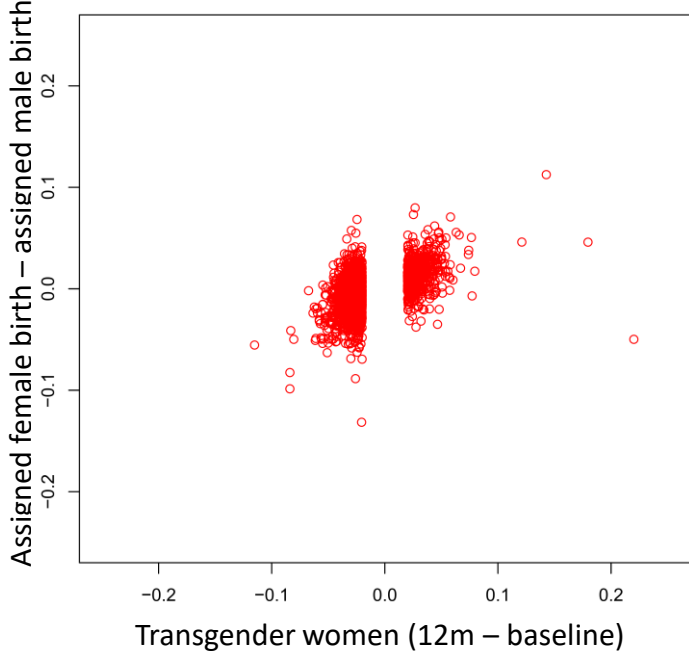

**C** Masculinizing GAHT 12m DMPs ( $p < 0.05$ ,  $\Delta\beta > 0.02$ )

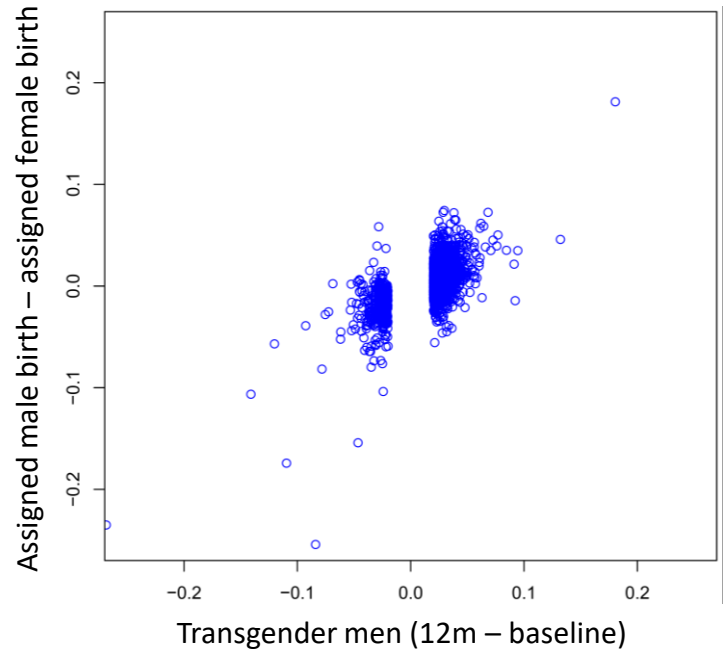

## A Pregnancy-associated DMPs

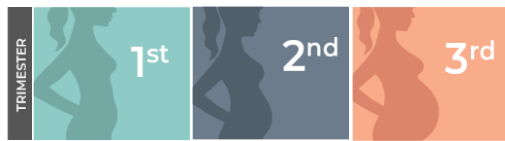

Gruzieva et al. 2019

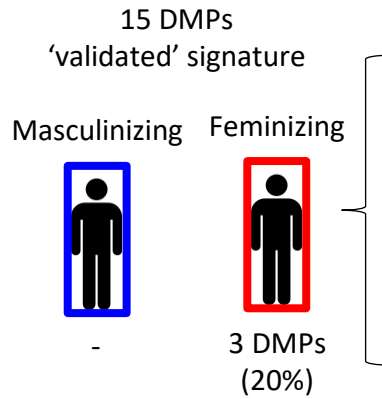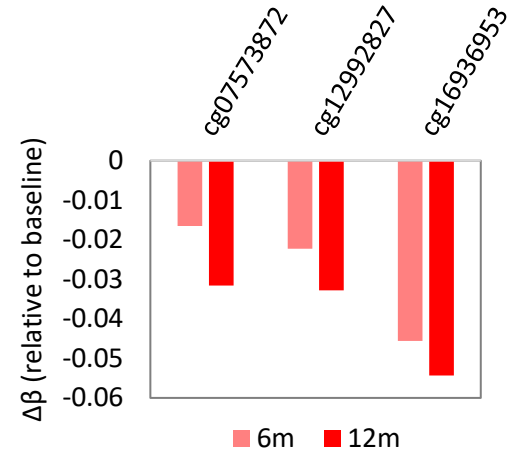

## B Rheumatoid Arthritis

354 rheumatoid arthritis cases

vs

337 controls

Liu et al. 2013

Top 5,000 DMPs

Masculinizing

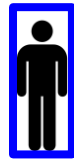

4 DMPs

Feminizing

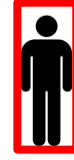

2 DMPs

~ 0.1%  
Overlap

**A Identifying DMRs**

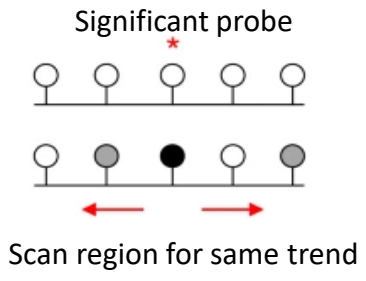

**B**

Feminizing GAHT (6 months v baseline):  
6 DMRs: near *TAS1R2*, *ZFP36L1*, *RTL1*, *MED31*, *VMP1*, *SLC35D3*

Feminizing GAHT(12 months v baseline):  
3 DMRs: near *CAT*, *LANCL3*, *HUS1*

Masculinizing GAHT (6 months v baseline):  
0 DMRs:

Masculinizing GAHT (12 months v baseline):  
3 DMRs: near *PRR4*, *PHF19*, *MMP17*

**C Transgender men - 3 DMRs (12 months v baseline)**

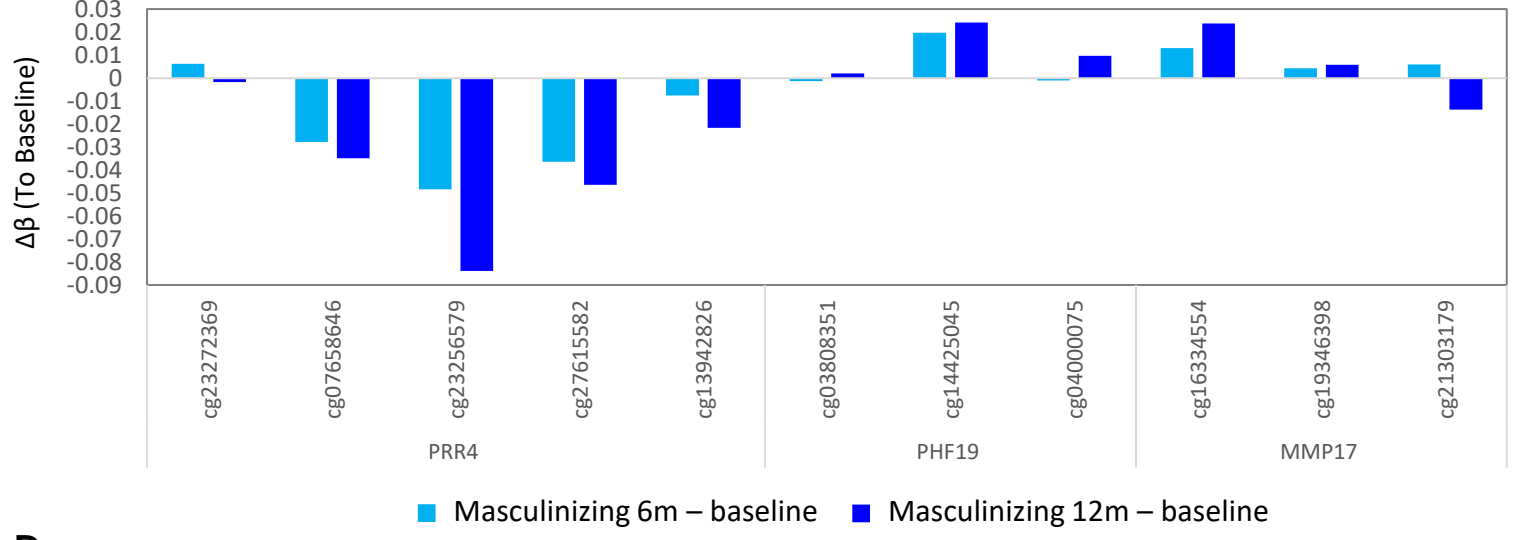

**D Transgender women - 6 DMRs (6 months v baseline)**

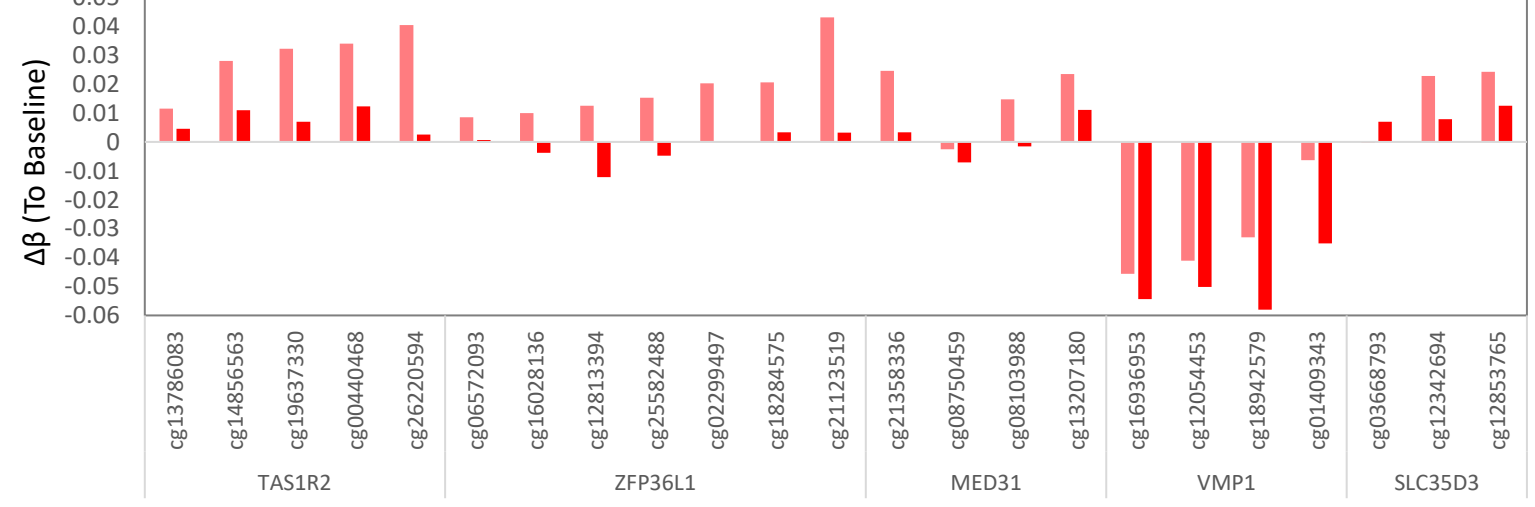

**E Transgender women - 3 DMRs (12 months v baseline)**

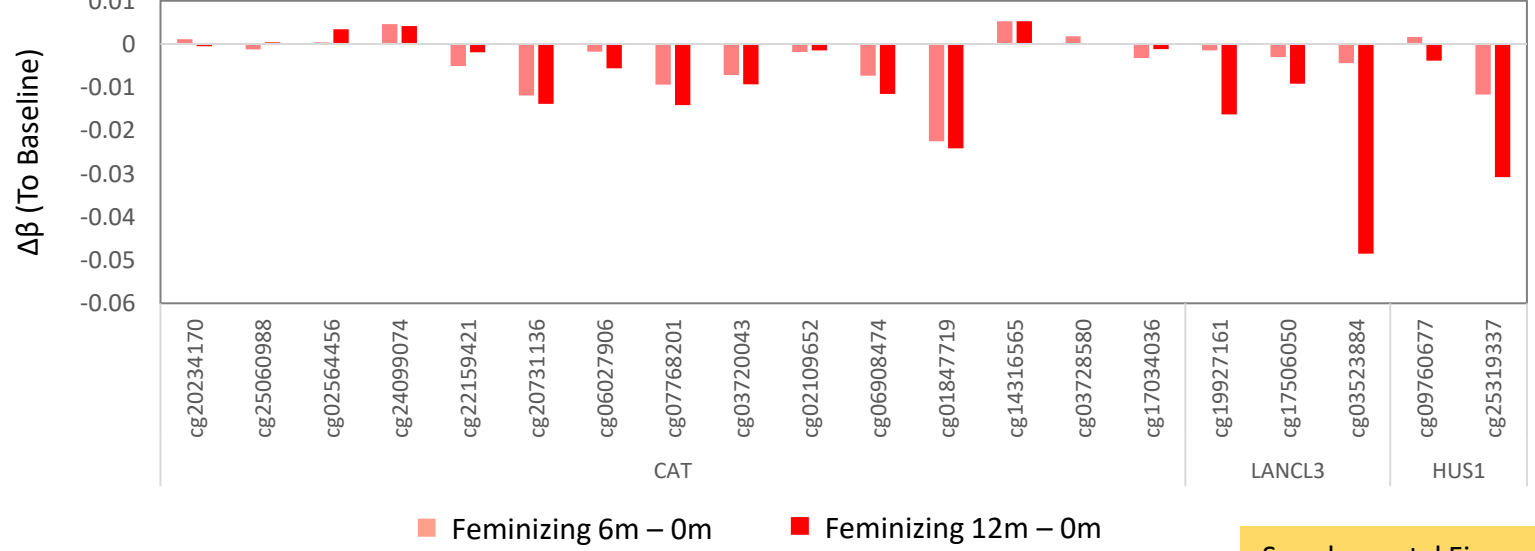

**A** Higher autosomal DNA methylation in assigned male at birth

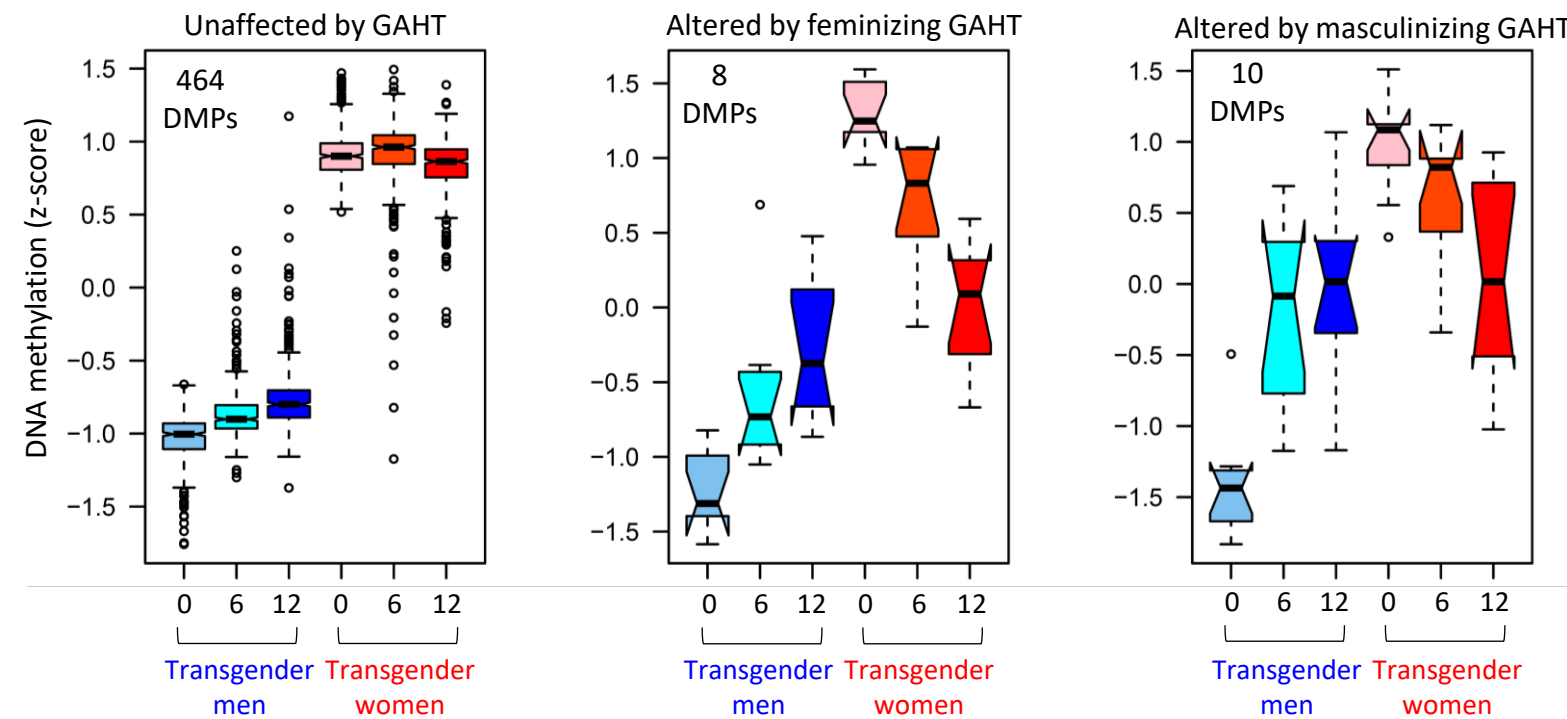

**B. X chromosome**

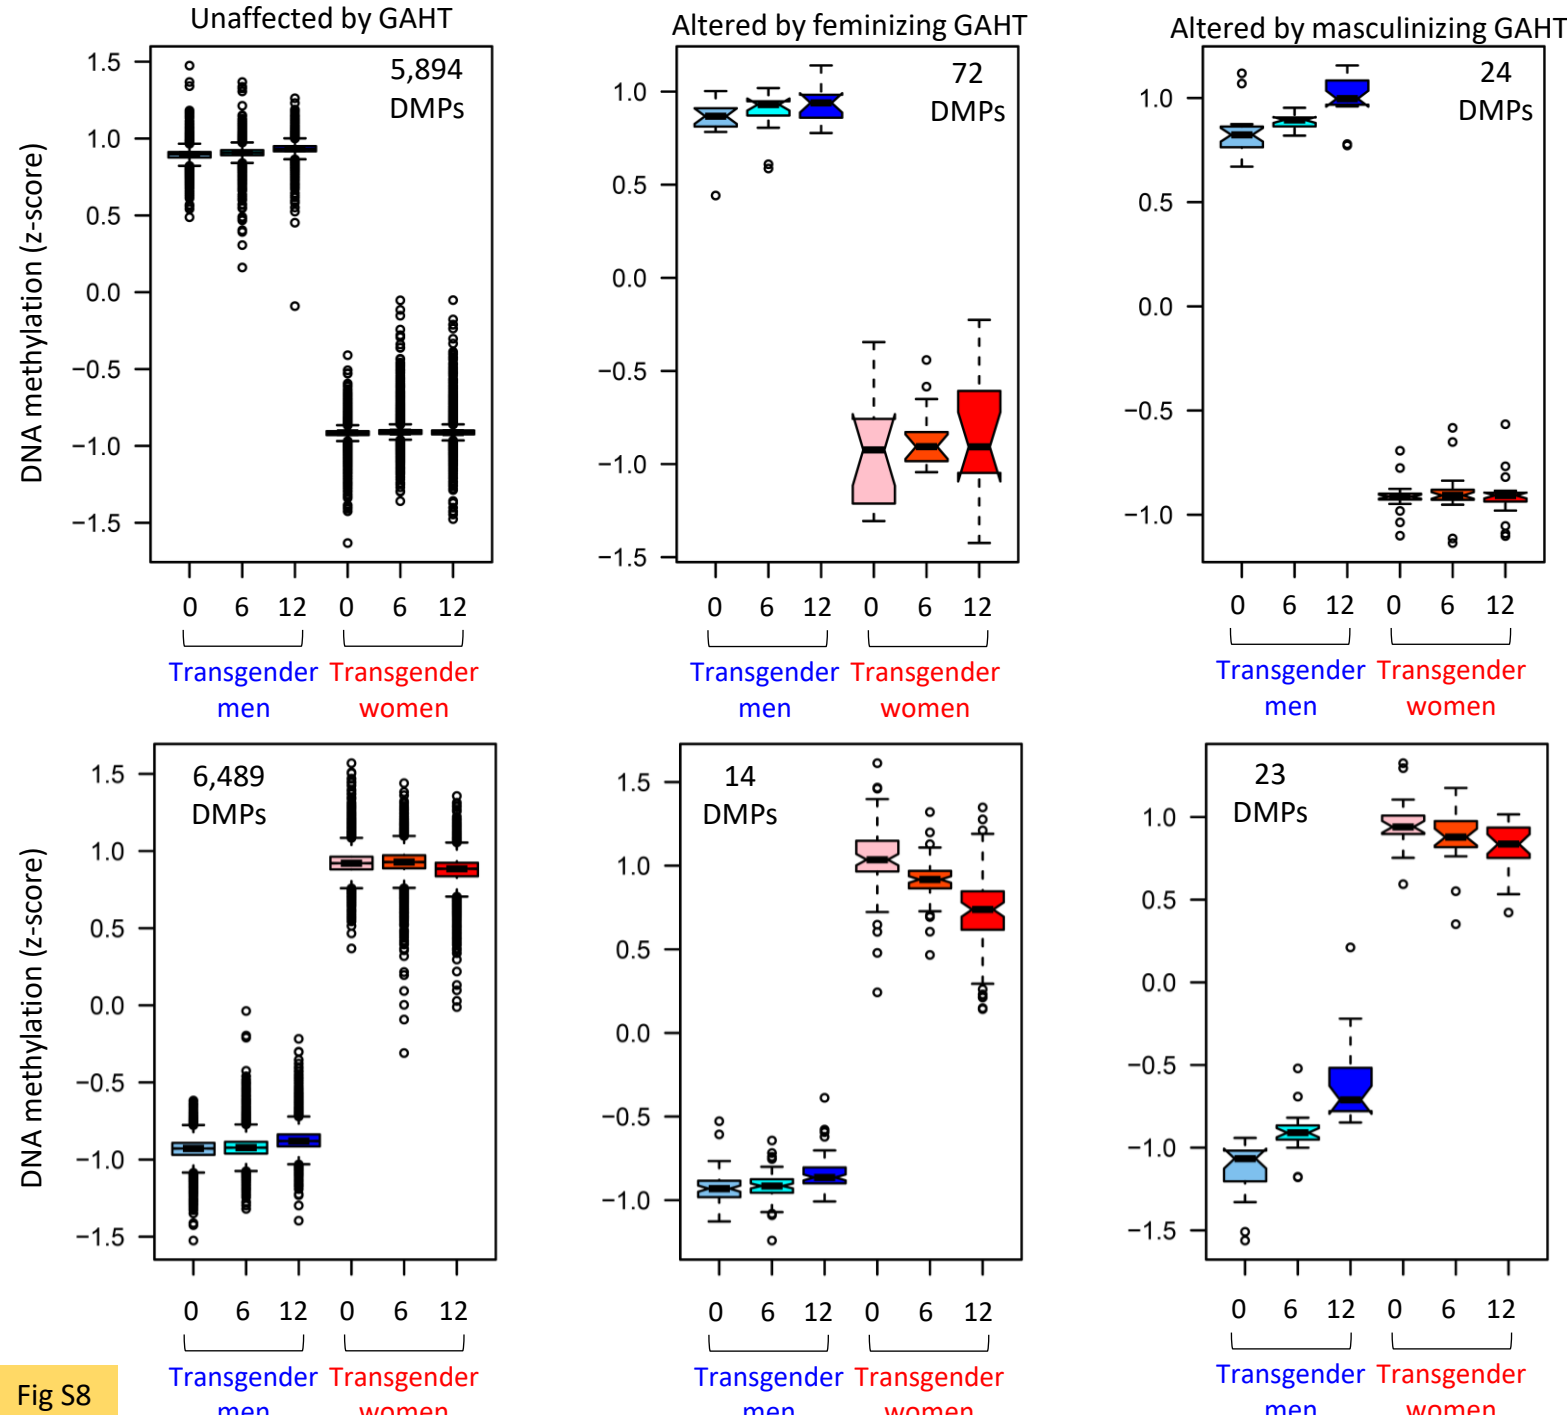

Fig S8



### XIST promoter DNA methylation

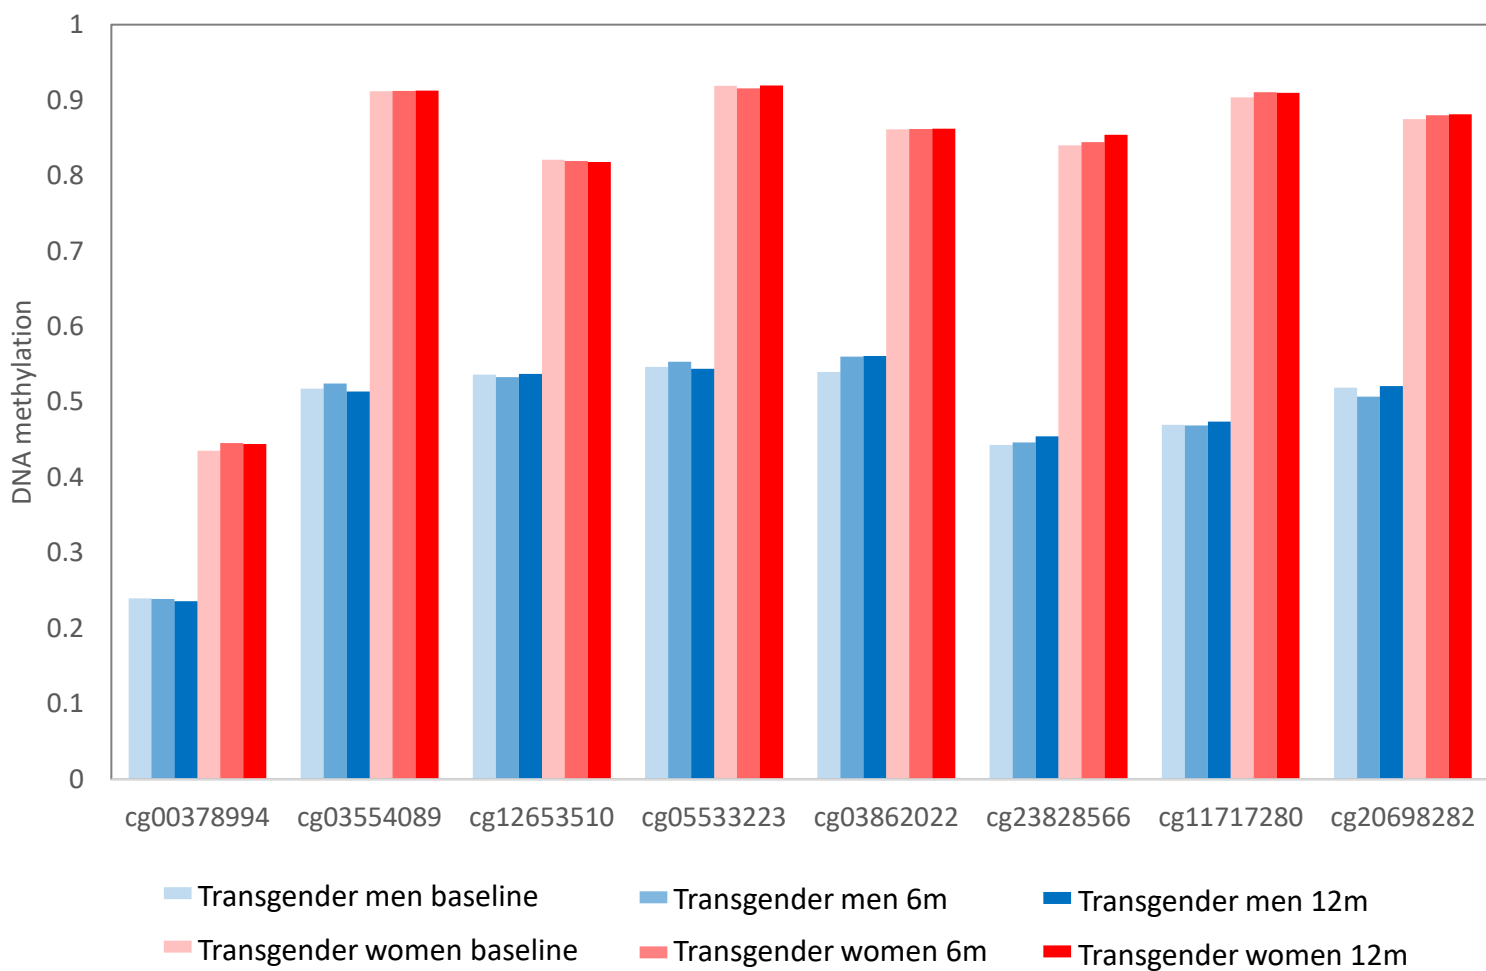

Figure S9

**A** Assigned female gain of methylation probes affected by 12-month masculinizing GAHT

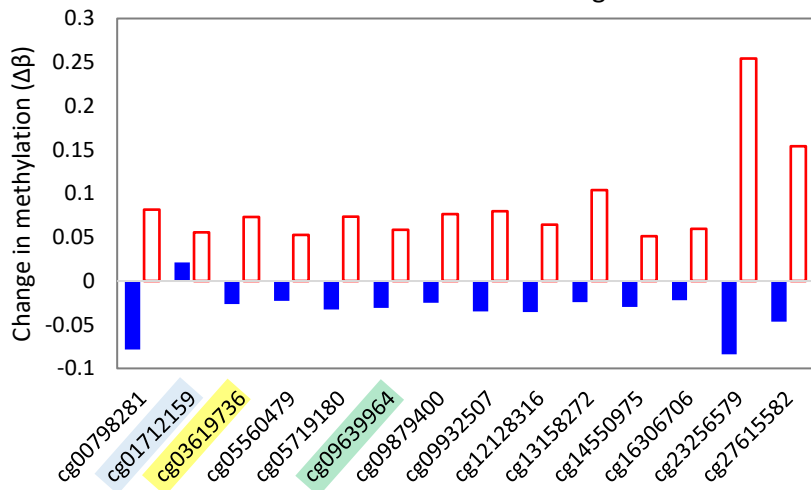

**B** Assigned female gain of methylation probes affected by 12-month feminizing GAHT

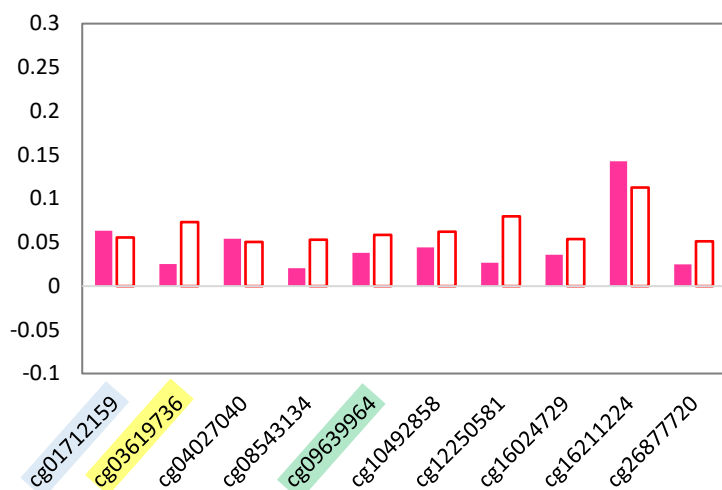

**C** Assigned female loss of methylation affected by 12-month masculinizing GAHT

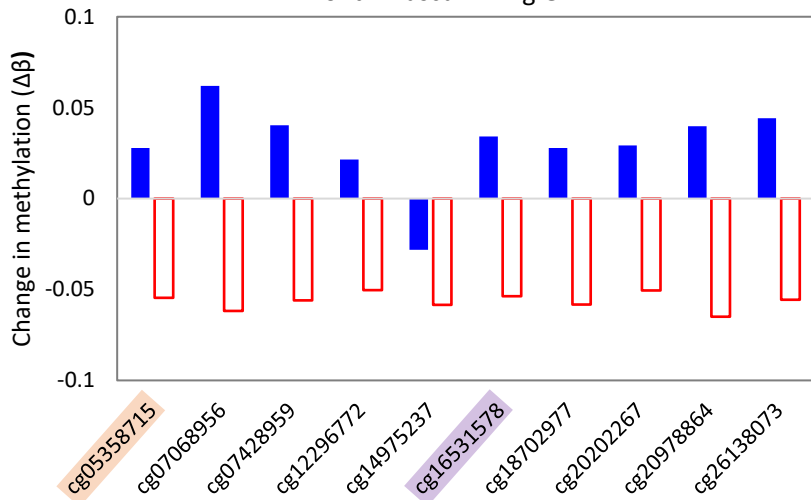

**D** Assigned female loss of methylation probes affected by 12-month feminizing GAHT

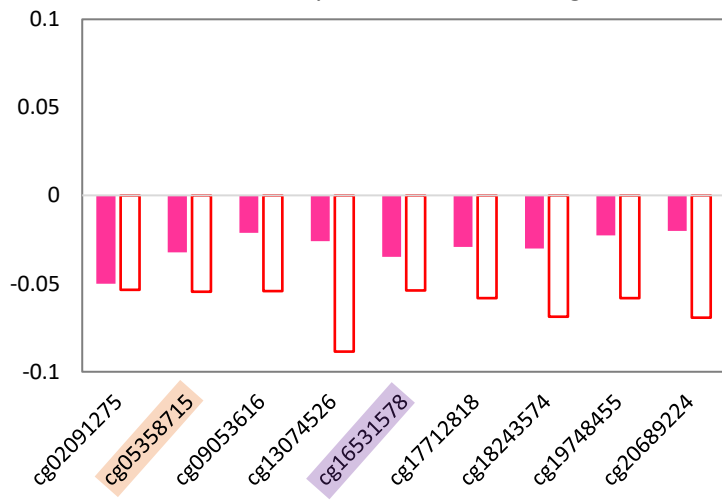

■ Masculinizing 12m - 0m    ■ Feminizing 12m - 0m  
□ Baseline Transgender men - Baseline Transgender women

|                         |
|-------------------------|
| <i>CHMP1A</i> (-45)     |
| <i>ACACB</i> (+368)     |
| <i>CBFA2T3</i> (+48872) |
| <i>TIMM22</i> (+8944)   |
| <i>TRERF1</i> (+49685)  |
